# Supplementary material for: Effect of Background Magnetic Field on Type-II Superconductor under Oscillating Magnetic Field Simulated Using Ginzburg-Landau Model
Source: Hindawi journal article supplement (doi:10.1155/2018/7615862), 2018-11-12
Supplement: f1 [file 7615862.f1.docx]

Supplementary information

Effect of Background Magnetic Field on Type-II Superconductor Under Oscillating Magnetic Field Simulated Using Ginzburg-Landau Model

Hasnain Mehdi Jafri1, Xingqiao Ma1*, Congpeng Zhao1,2 and Houbing Huang1,3

1Department of Physics, University of Science and Technology Beijing, Beijing 100083, P. R. China

2ASIC, China Center for Information Industry Development, Beijing 100083, P. R. China

3Advanced Research Institute of Multidisciplinary Science, Beijing Institute of Technology, Beijing 100081, P. R. China

*Email: [xqma@sas.ustb.edu.cn](mailto:xqma@sas.ustb.edu.cn)


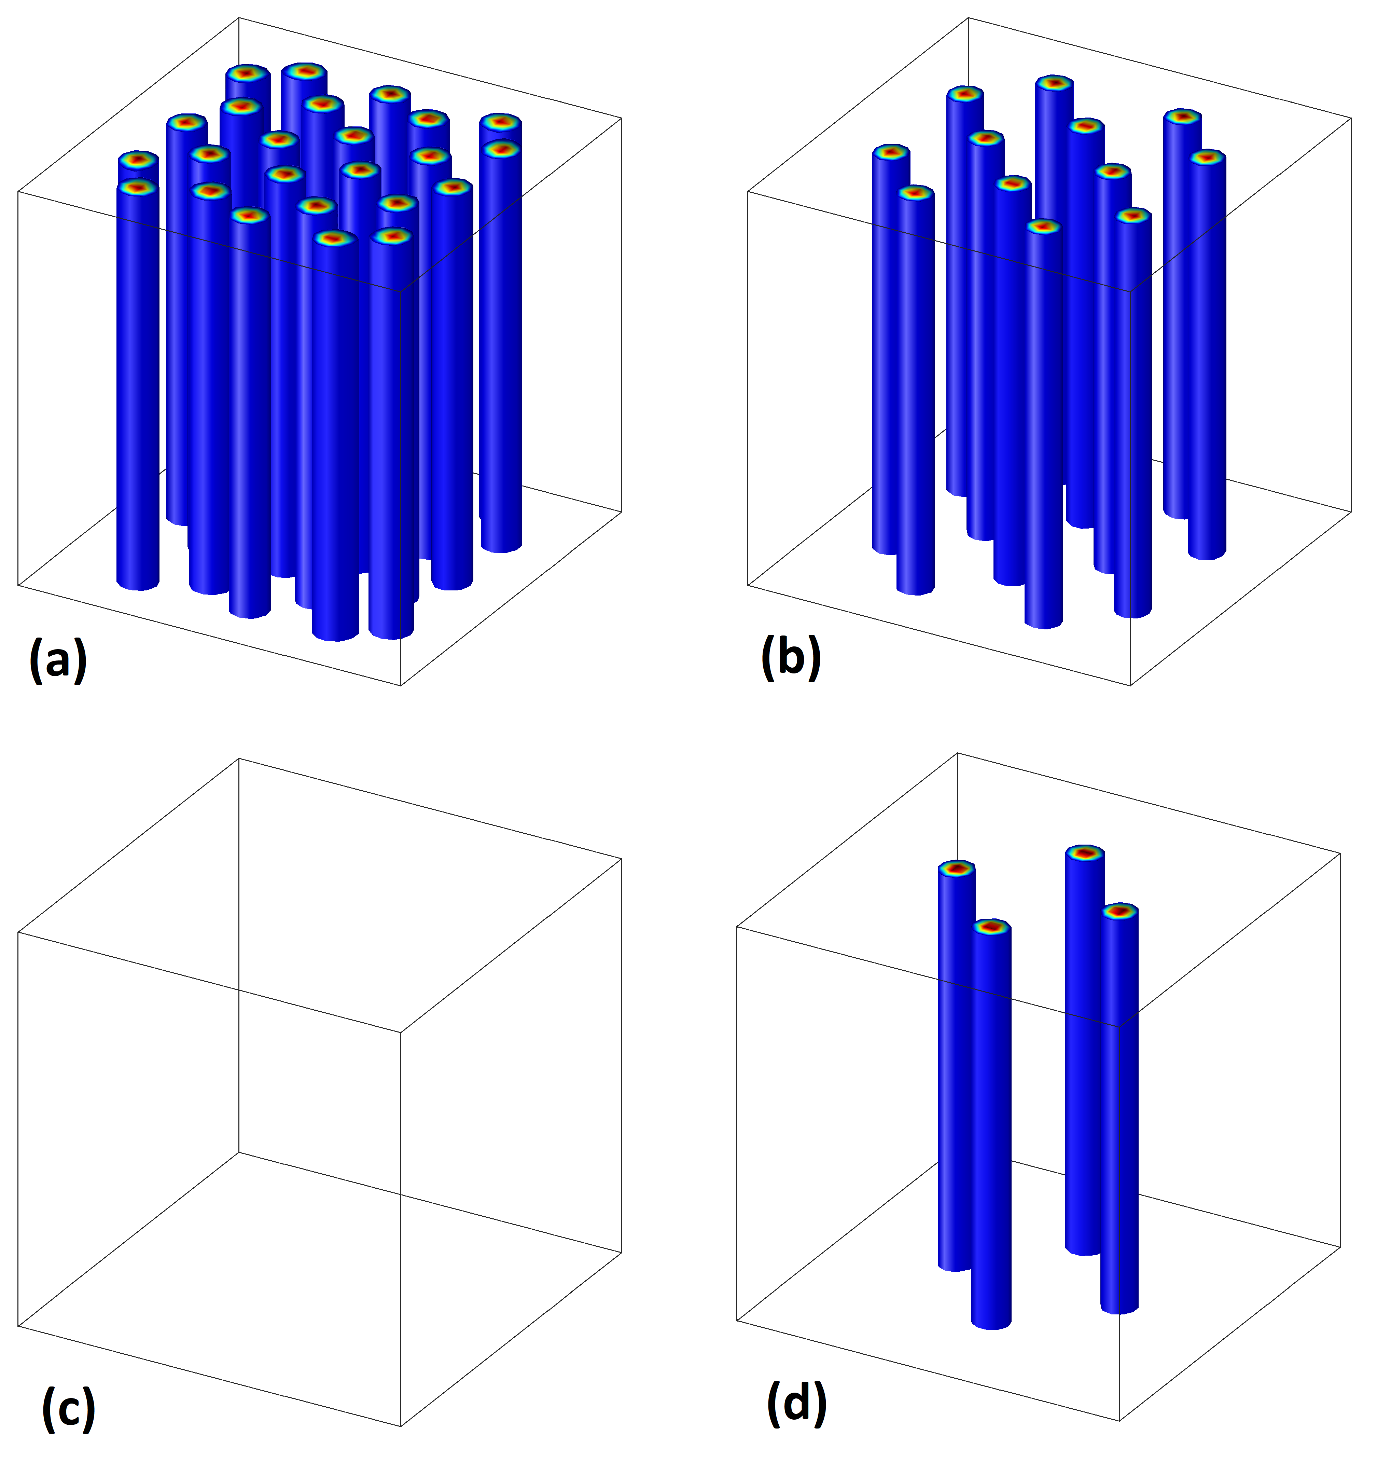


Figure S1. vortex structure of the sample at *(a)*Bz=0.6*κ* (oscillating magnetic field), *(b) Bz=0.3κ* (oscillating magnetic field), *(c)Bz= 0.15κ* (oscillating magnetic field)and *(d) Bz= 0.15κ* (non-oscillating magnetic field) forcubic sample of size , with parameters *κ=4* and *σ=1*.

Figure S1 shows the vortex structure of the sample at *(a)*Bz=0.6*κ* (oscillating magnetic field), *(b) Bz=0.3κ* (oscillating magnetic field), *(c)Bz= 0.15κ* (oscillating magnetic field)and *(d) Bz= 0.15κ* (non-oscillating magnetic field) forcubic sample of size , with parameters *κ=4* and *σ=1*. Vortices appear in magnetic field *Bz=0.15κ* if the field is not oscillatory, ot the frequency of oscillations is significantly low, but at frequencies in the range of that reported in the present work (i.e., *0.00278/t*) only magnetic field penetration from the boundaries was observed (not shown in the figure).
